# Supplementary material
Source: PubMed Central journal article supplement (PMC3260886)

A

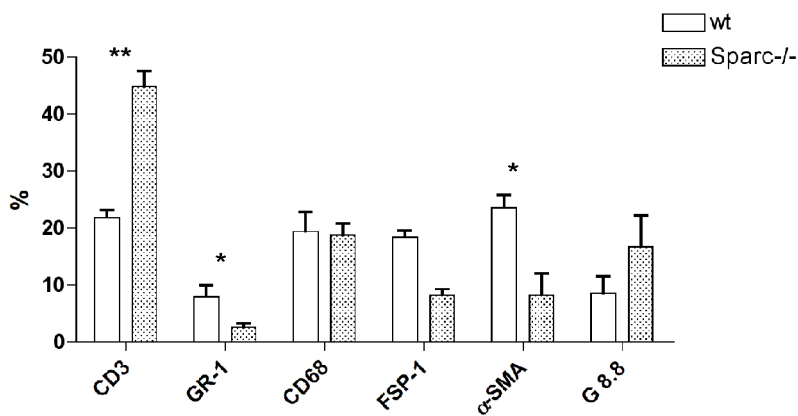

wt

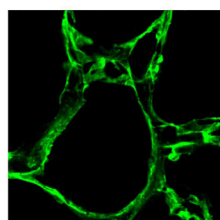

Collagen IV

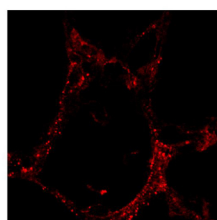

SPARC

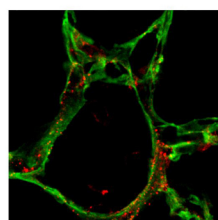

Merge

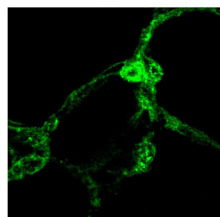

FSP-1

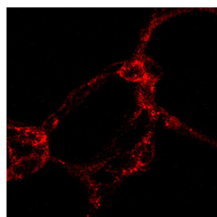

SPARC

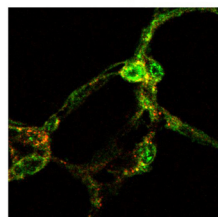

Merge

Sparc<sup>-/-</sup>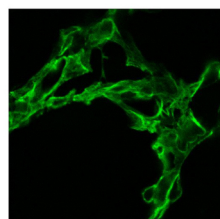

Collagen

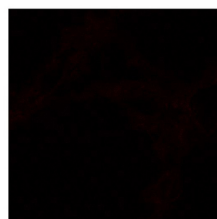

SPARC

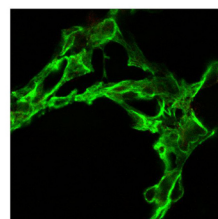

Merge

Supplement: mmc1.pdf [file mmc1.pdf]

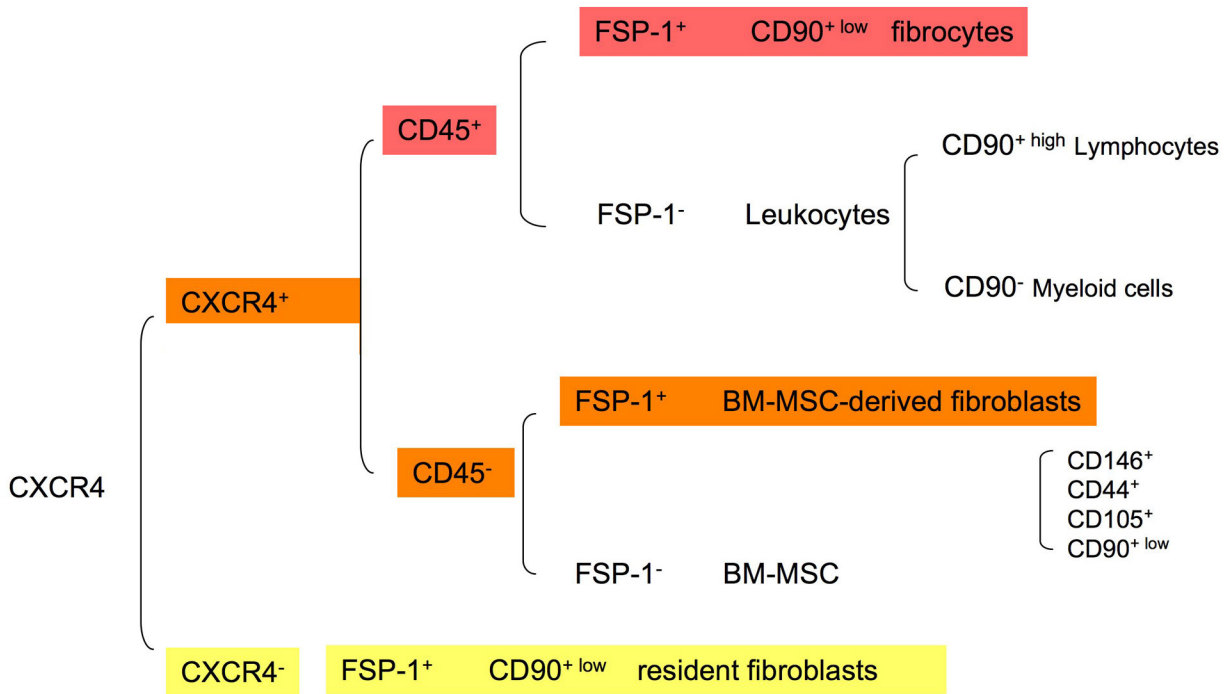

Supplement: mmc2.pdf [file mmc2.pdf]

WT (Thy 1b; CD90.2) > WT (Thy 1a; CD90.1)

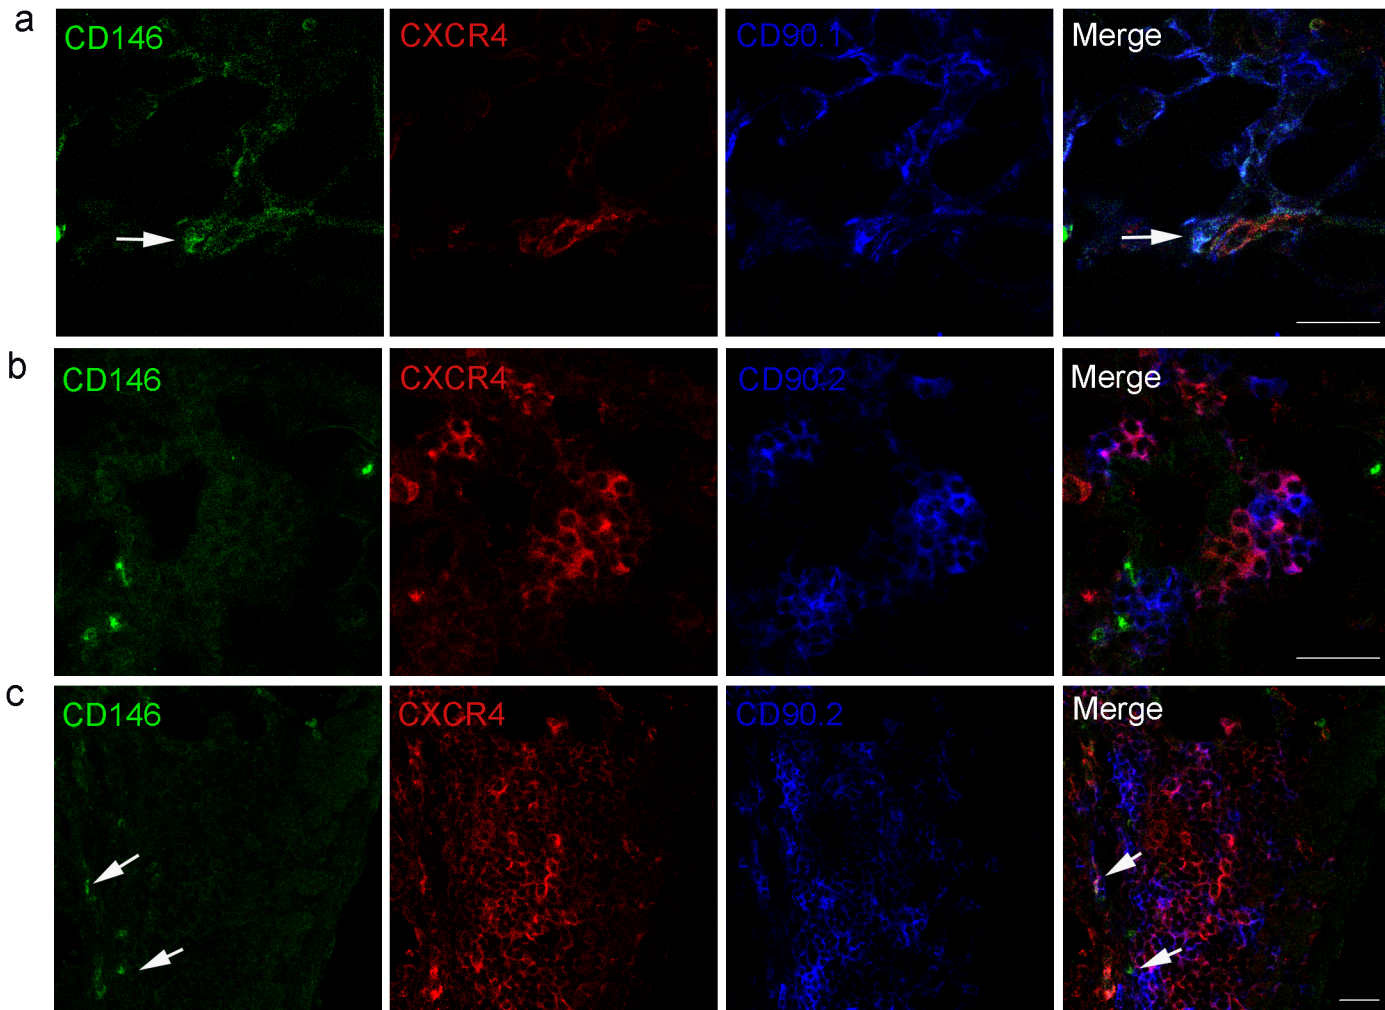

Supplement: mmc3.pdf [file mmc3.pdf]

**A**

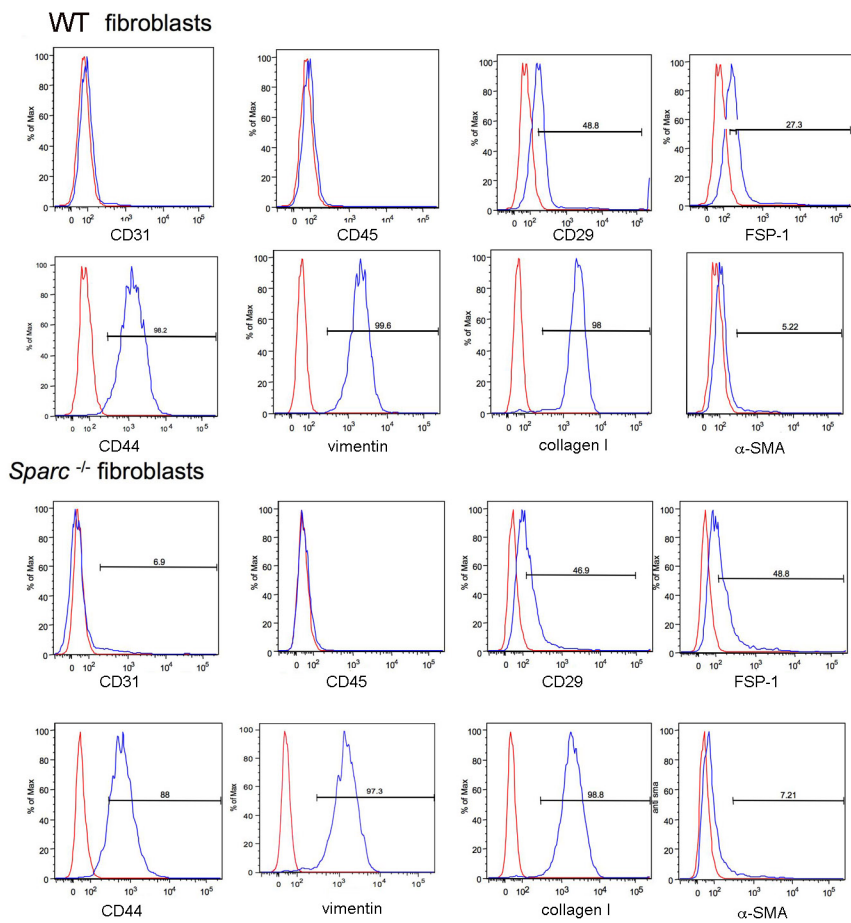

**B**

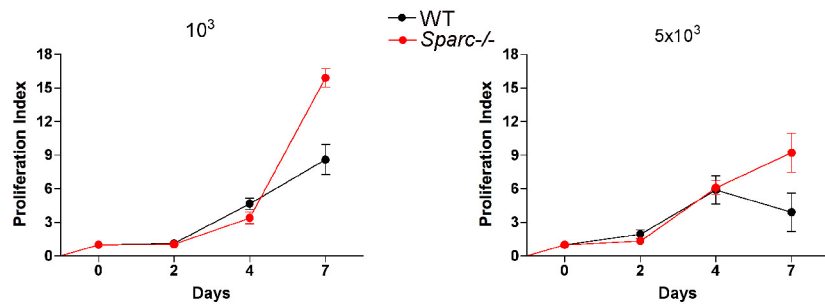

**C**

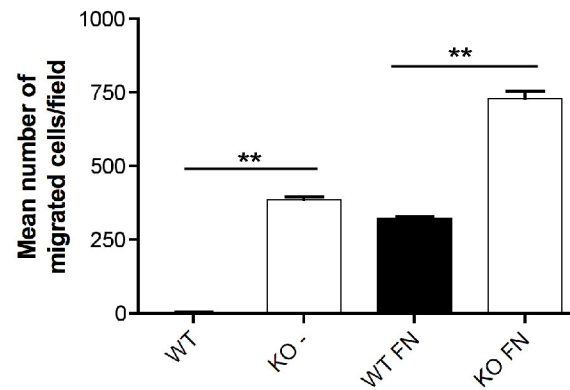

**D**

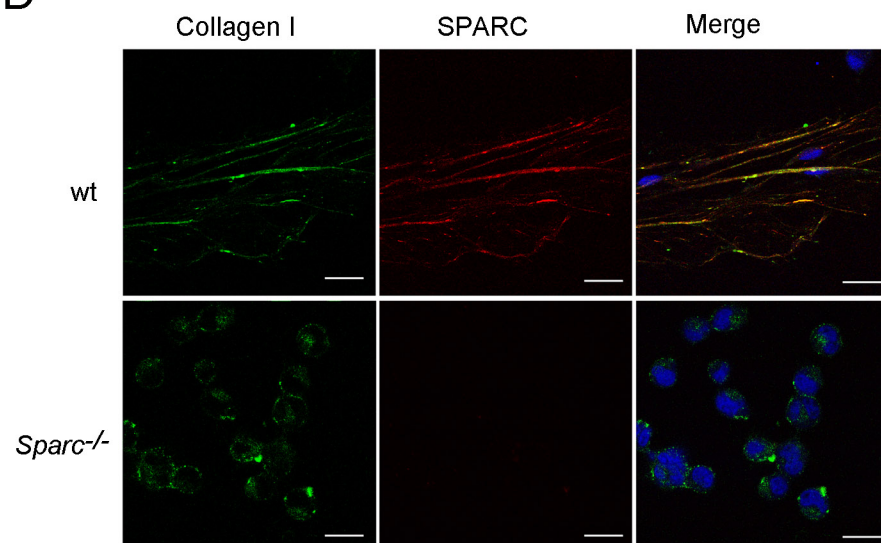

**E**

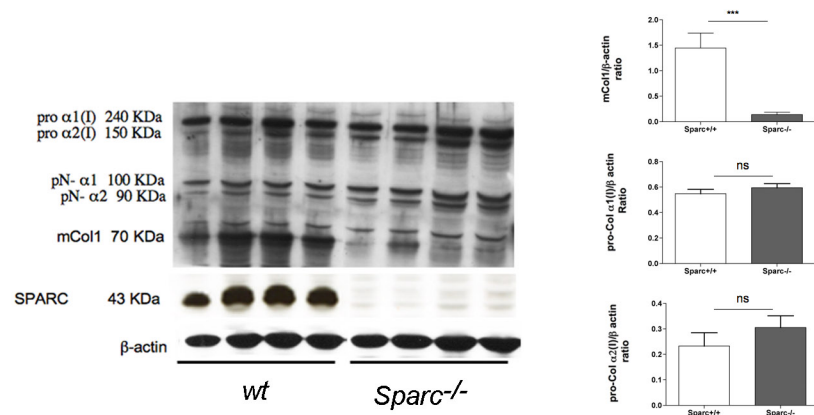

Supplement: mmc4.pdf [file mmc4.pdf]

■ KO > WT  
□ WT > WT

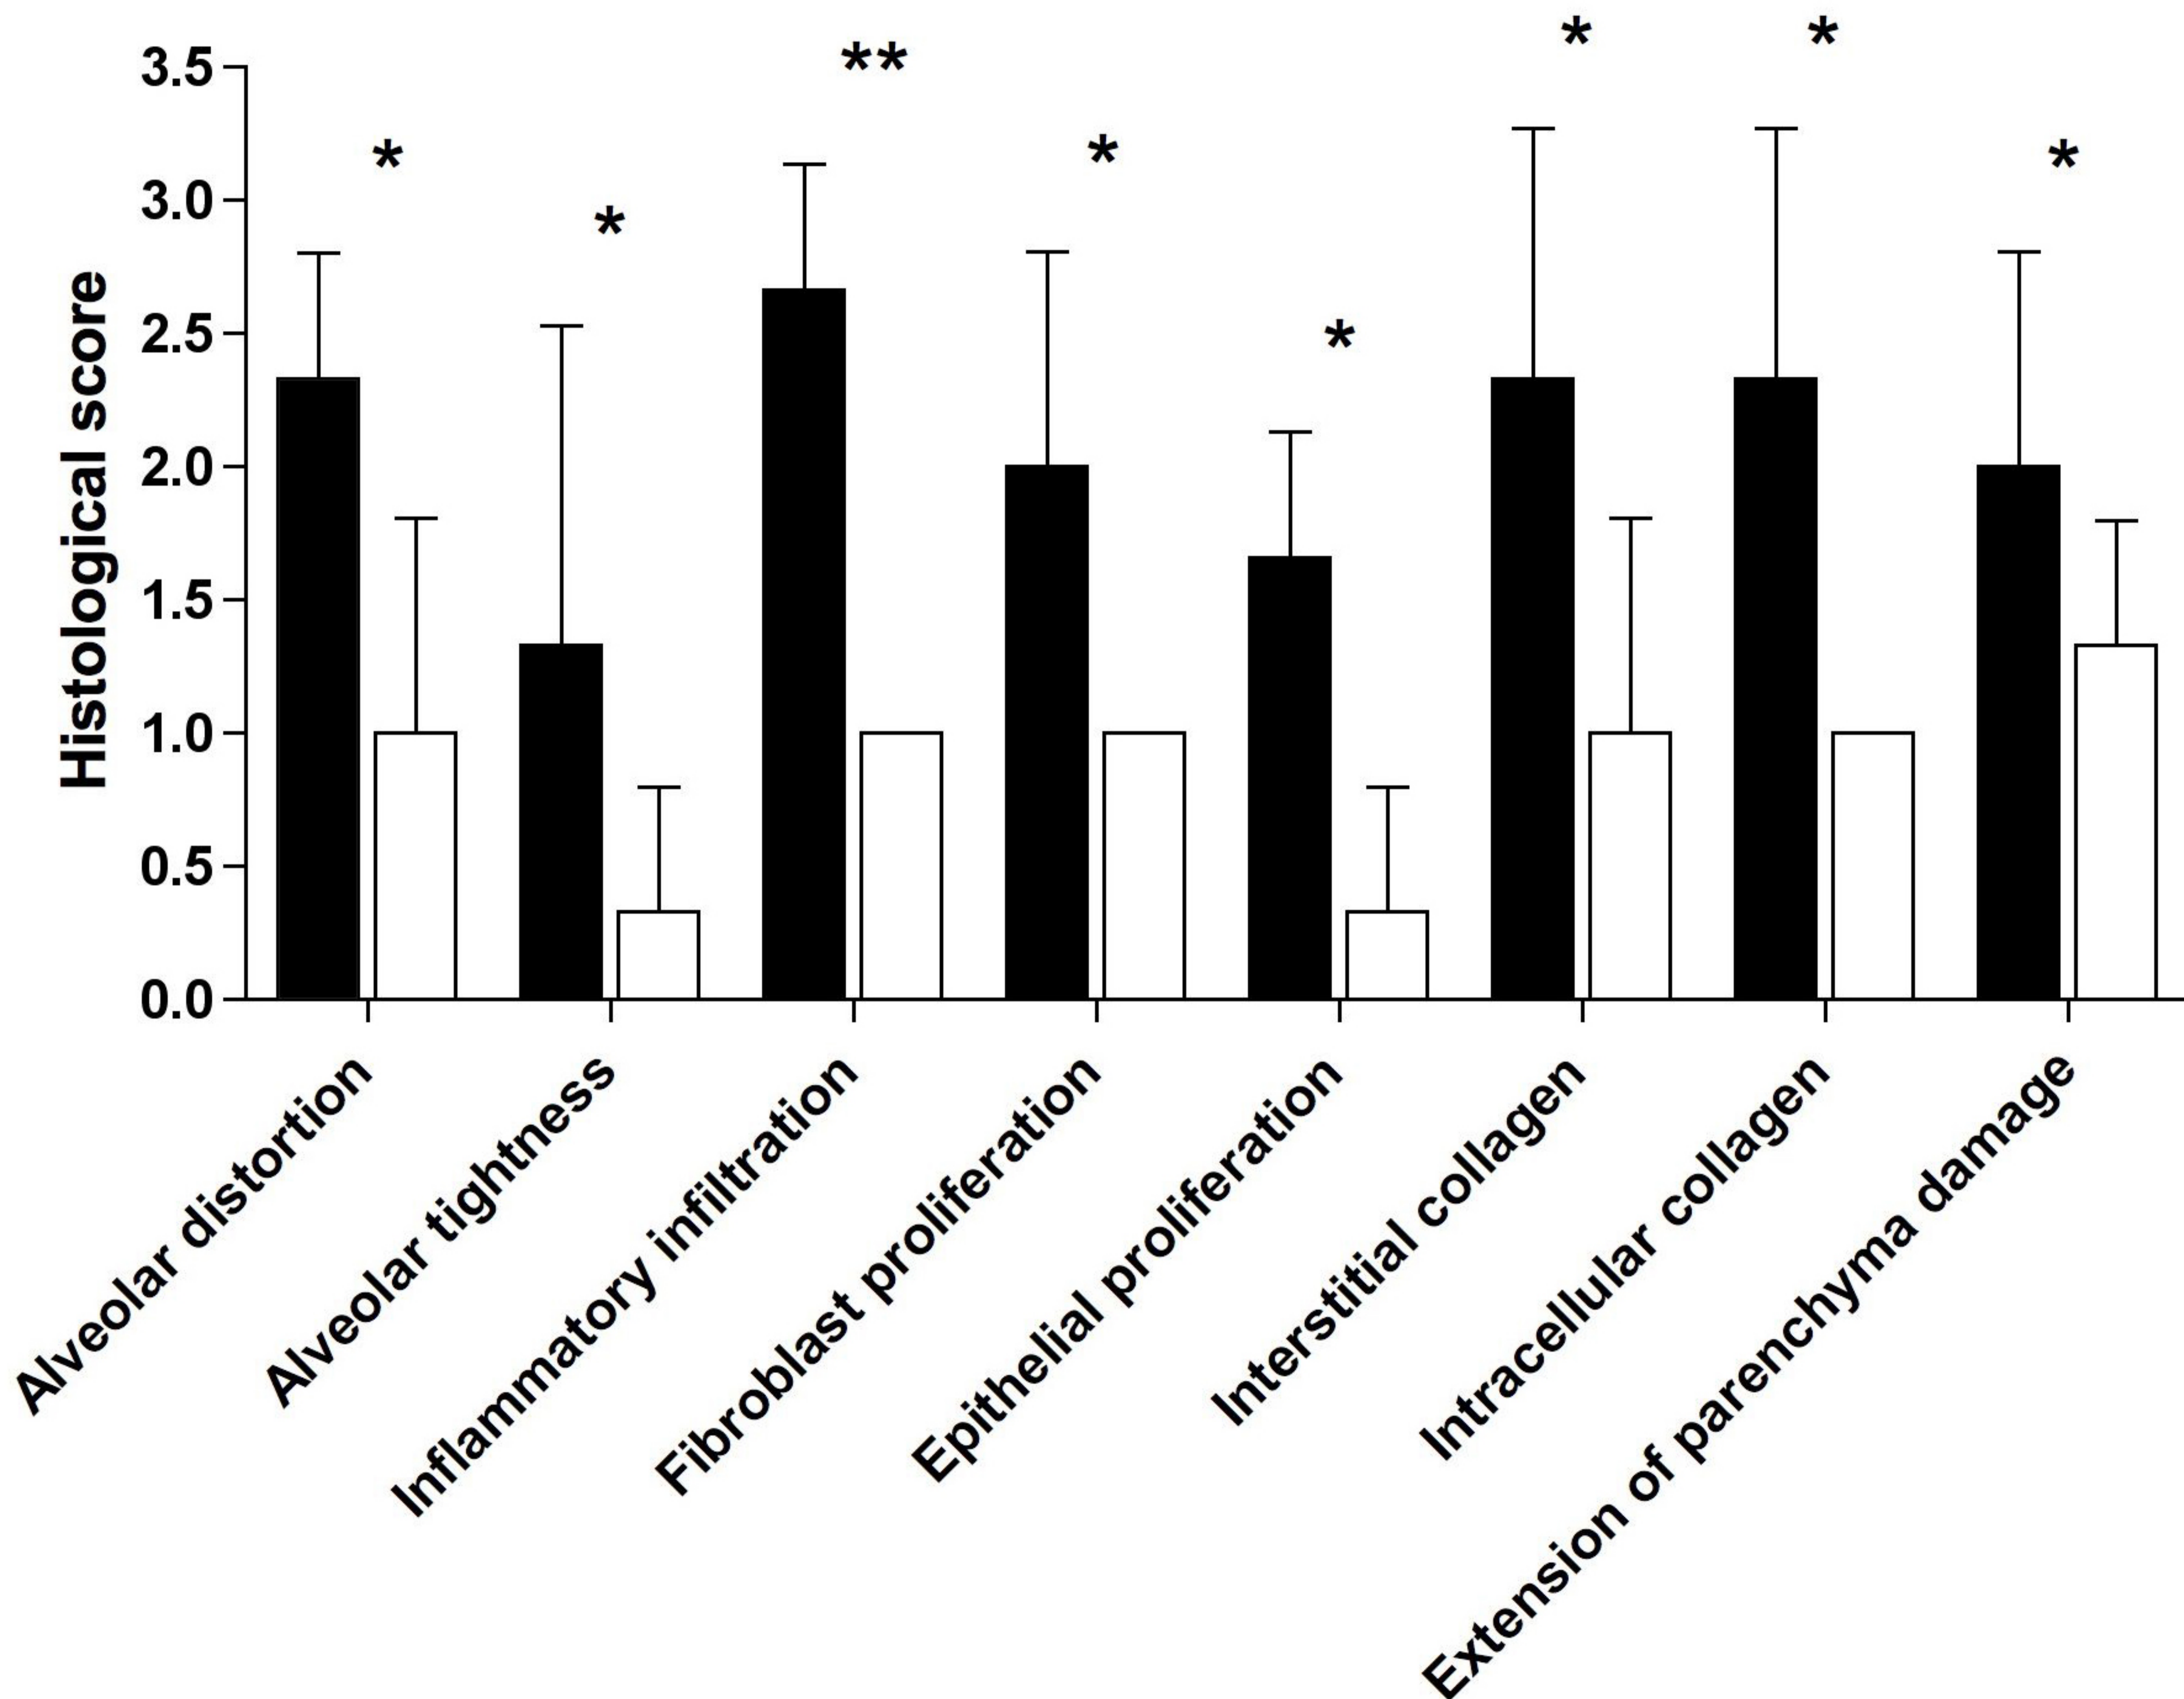

Supplement: mmc5.pdf [file mmc5.pdf]

■ KO > KO

□ WT > KO

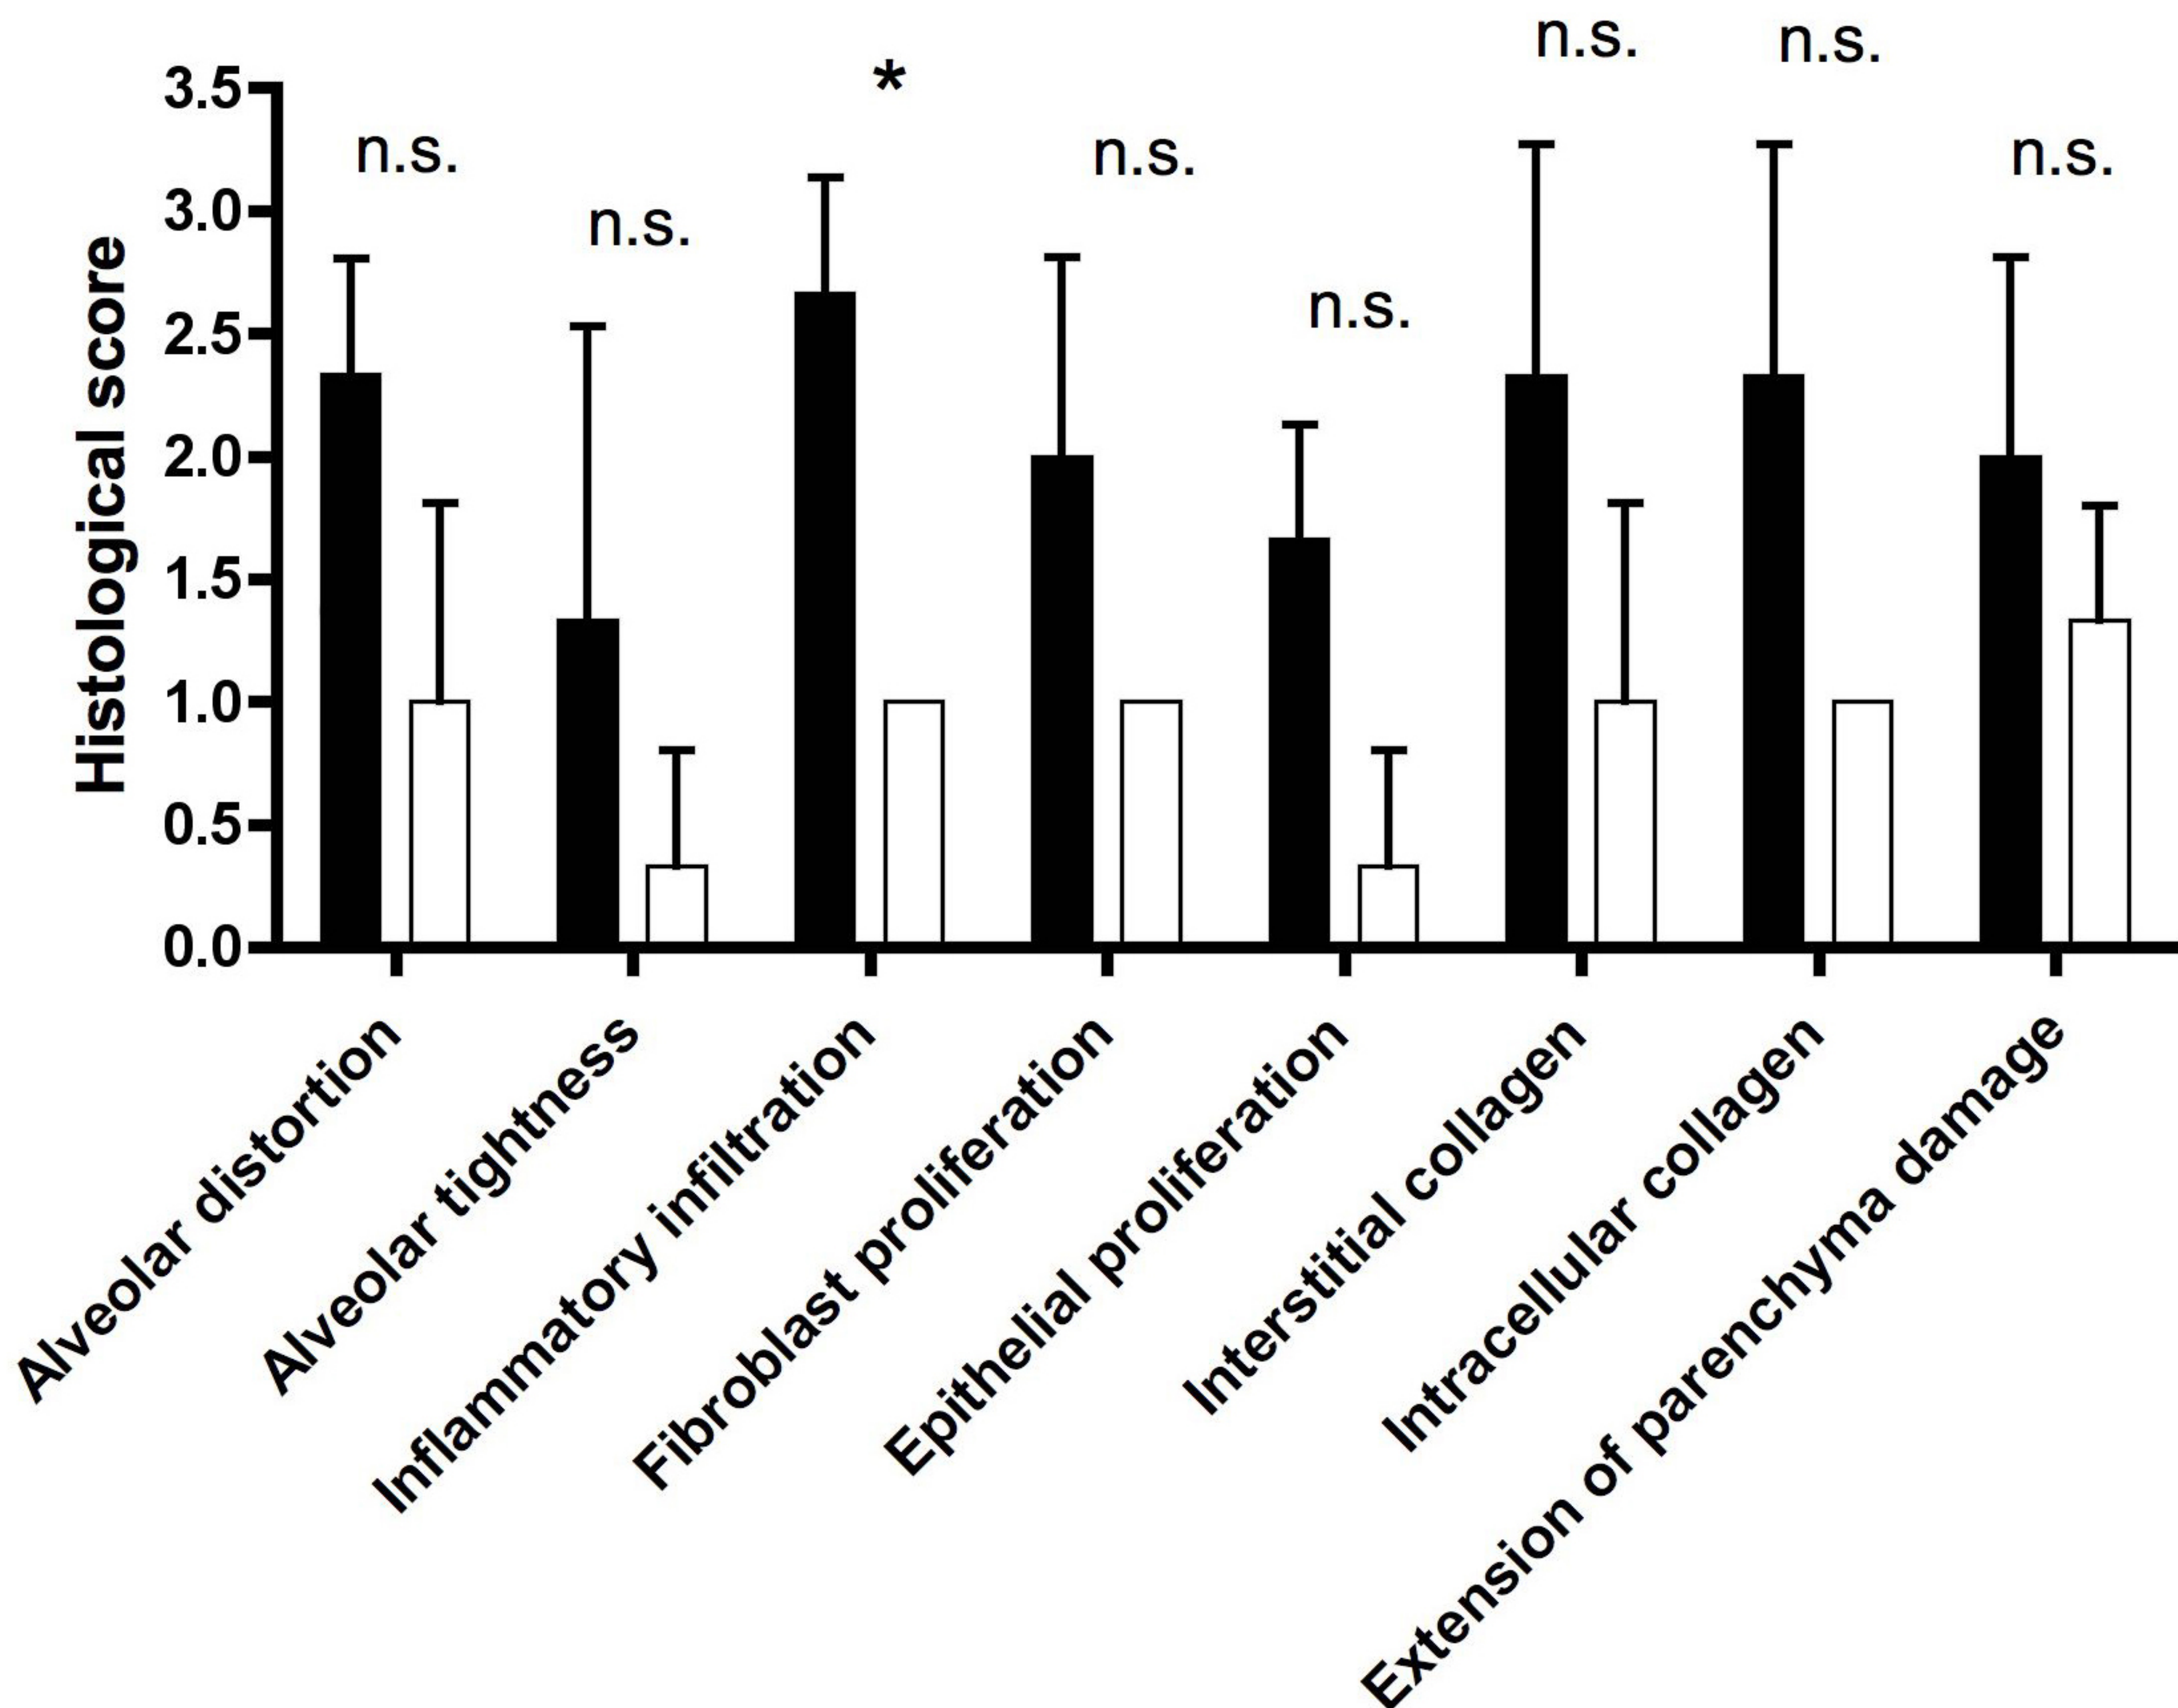

Supplement: mmc6.pdf [file mmc6.pdf]

A

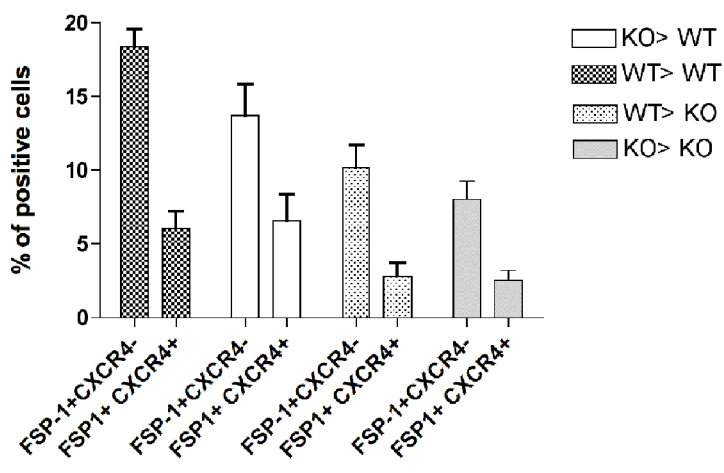

B

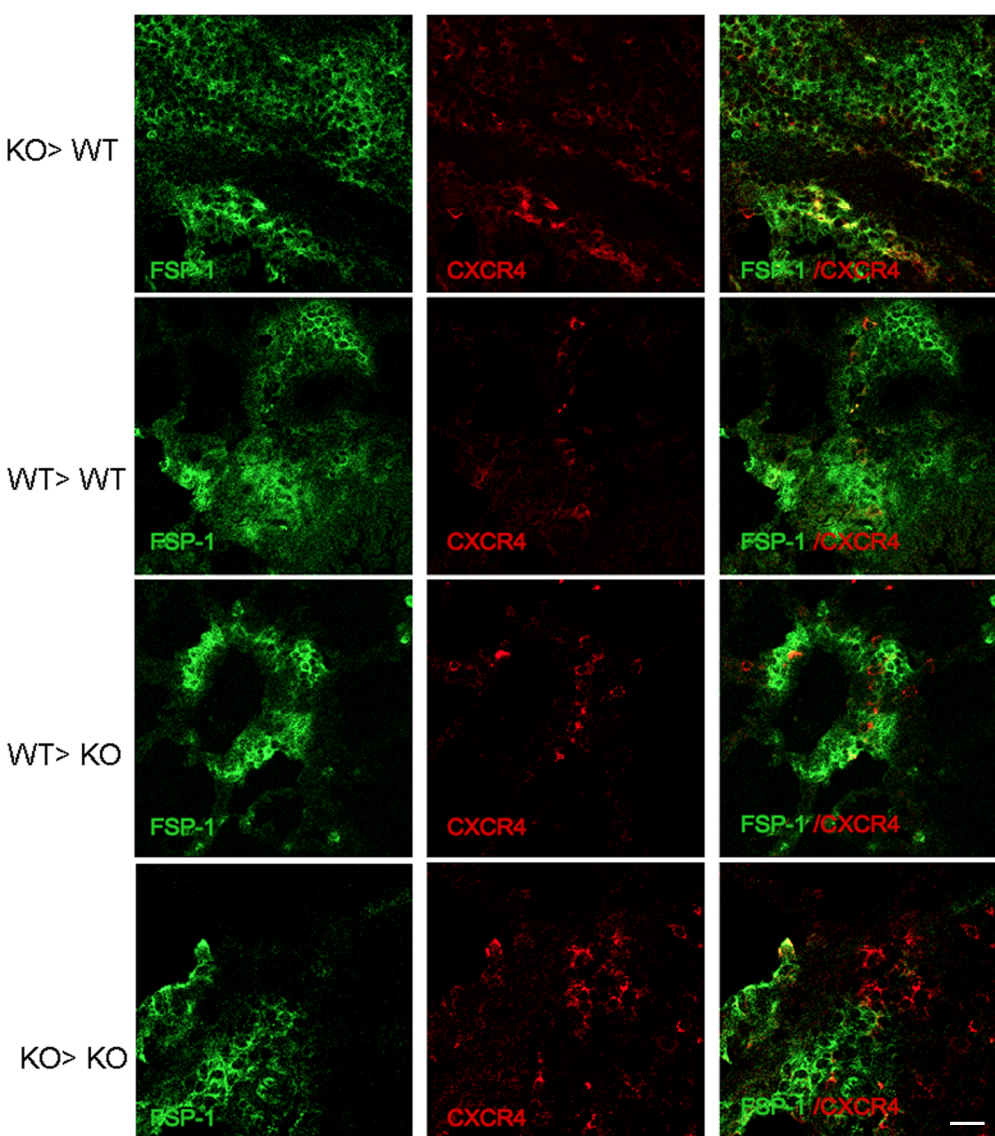

Supplement: mmc7.pdf [file mmc7.pdf]

■ KO > WT + V1q  
□ KO > WT + Ctrl Ab

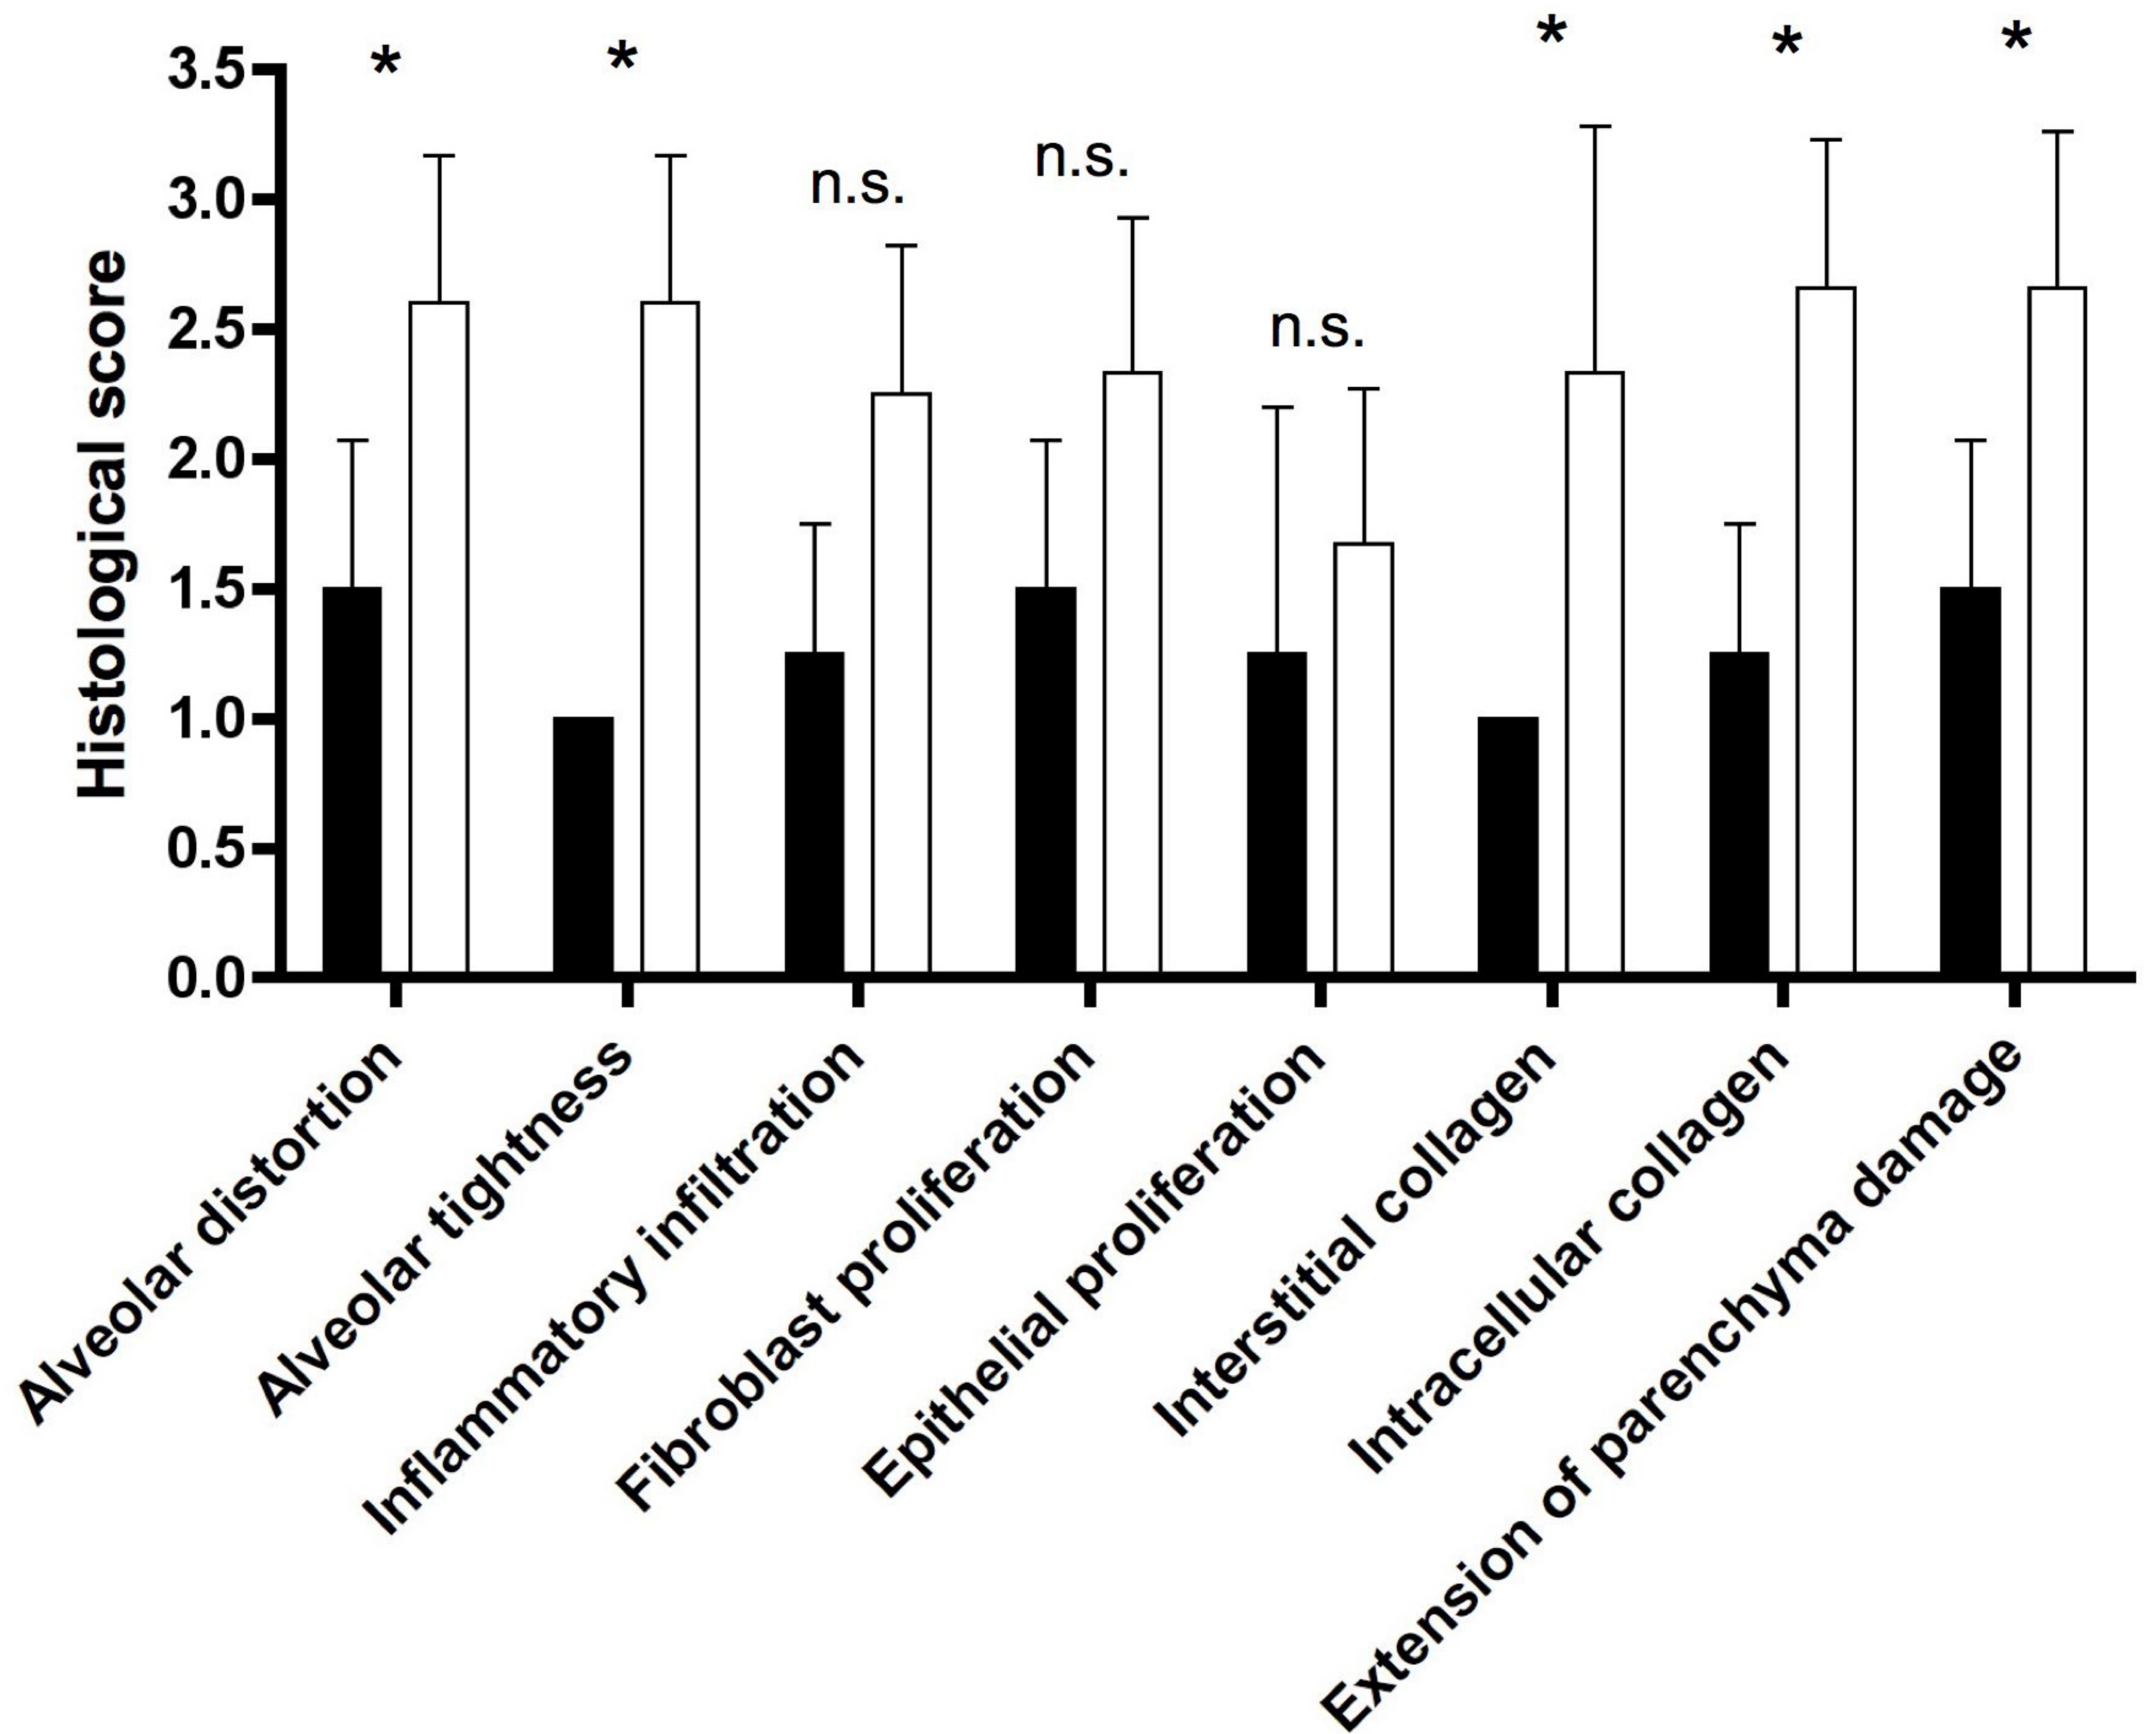

Supplement: mmc8.pdf [file mmc8.pdf]

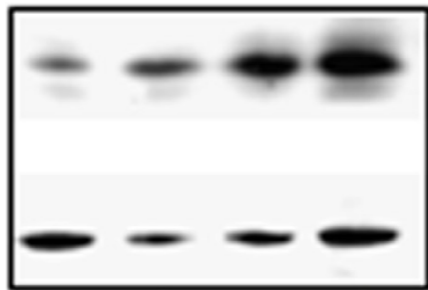

**TGFβ**

actin

TNF

-

+

-

+

wt Mφ

KO Mφ

Supplement: mmc9.pdf [file mmc9.pdf]
